# Supplementary material
Source: PubMed Central journal article supplement (PMC5130288)
Supplement: NIHMS830185-supplement-supplement_1.pdf [file NIHMS830185-supplement-supplement_1.pdf]

# Colony-morphology screening uncovers a role for the *Pseudomonas aeruginosa* nitrogen-related phosphotransferase system in biofilm formation

Matthew T. Cabeen, Sara A. Leiman and Richard Losick

## Supplementary Figure Legends

**Figure S1. The *adcA* gene is not required for colony wrinkling and shows induced expression in biofilm mutants.** A. Colony morphologies (4 d) of cells with the *amrZ* deletion alone or in combination with an *adcA* deletion.  
B. Expression of a  $P_{adcA}$ -lux reporter in the listed strains. Luciferase activity was calculated by normalizing luminescence to culture optical density. Results represent the average of 3 biological replicates (each having 4 technical replicates) using cultures grown on M6301-1% agar for 24 or 48 hours. Error bars show the standard deviation. \*  $p < 0.05$ ; \*\*  $p < 0.005$ ; \*\*\*  $p < 0.0005$  compared to the *amrZ* mutant. Luciferase activity was also assessed at day 3 and 4; the results were comparable to the results shown for day 2.

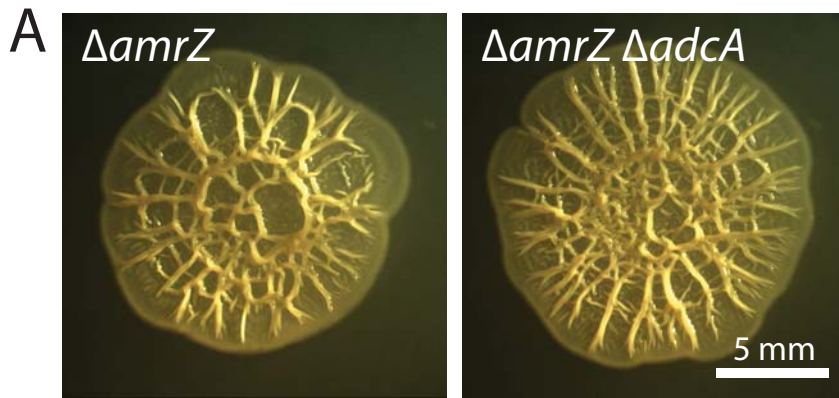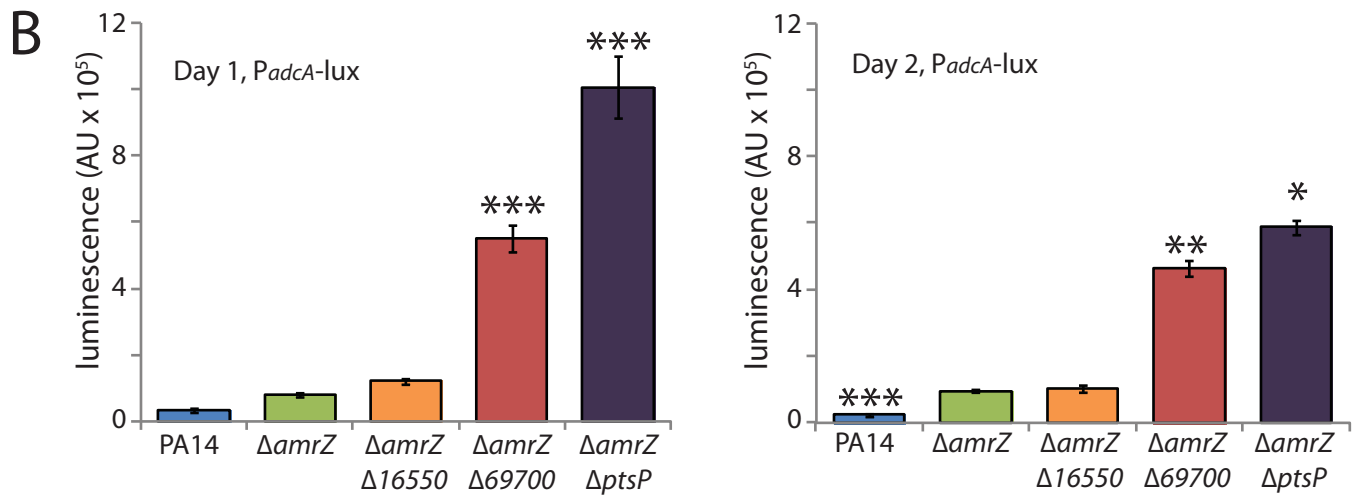

Figure S1

**Table S1. Summary of recovered transposon mutants**

| Gene                                                              | Colony Wrinkling Phenotype <sup>a</sup> | PA14 gene number | # of independent hits | Comments <sup>b</sup>                                                                                                                                                    |
|-------------------------------------------------------------------|-----------------------------------------|------------------|-----------------------|--------------------------------------------------------------------------------------------------------------------------------------------------------------------------|
| <i>Mutants with reduced colony wrinkling compared to parental</i> |                                         |                  |                       |                                                                                                                                                                          |
| <i>PA14_03370</i>                                                 | reduced                                 | 03370            | 1                     | In operon downstream of a newly annotated open reading frame.                                                                                                            |
| <i>PA14_06640</i>                                                 | reduced                                 | 06640            | 1                     |                                                                                                                                                                          |
| <i>PA14_07780</i>                                                 | smooth                                  | 07780            | 1                     | First gene in a 3-gene operon; hit in sense orientation, may read into <i>PA14_07790</i> and <i>djIA</i> .                                                               |
| <i>PA14_16550</i>                                                 | smooth                                  | 16550            | 1                     |                                                                                                                                                                          |
| <i>PA14_20520</i>                                                 | smooth                                  | 20520            | 1                     | Second gene in 2-gene operon with <i>PA14_20510</i> .                                                                                                                    |
| <i>PA14_21850</i>                                                 | reduced                                 | 21850            | 2                     | Second gene in 2-gene operon with <i>PA14_21860</i> .                                                                                                                    |
| <i>PA14_24620</i>                                                 | reduced                                 | 24620            | 1                     |                                                                                                                                                                          |
| <i>PA14_49880</i>                                                 | reduced                                 | 49880            | 1                     | First gene in 2-gene operon with <i>PA14_49890</i> .                                                                                                                     |
| <i>PA14_57170</i>                                                 | smooth                                  | 57170            | 1                     |                                                                                                                                                                          |
| <i>acpD</i>                                                       | reduced                                 | 22490            | 1                     |                                                                                                                                                                          |
| <i>aldG</i>                                                       | reduced                                 | 33890            | 1                     | First gene in 2-gene operon with <i>PA14_33900</i> .                                                                                                                     |
| <i>algK</i>                                                       | smooth                                  | 18520            | 1                     | Fourth gene in an 8-gene alginate-related operon spanning from <i>PA14_18580</i> to <i>PA14_18470</i> .                                                                  |
| <i>aprA</i>                                                       | reduced                                 | 48060            | 1                     |                                                                                                                                                                          |
| <i>argC</i>                                                       | smooth                                  | 08480            | 1                     | First gene in 3-gene operon with <i>PA14_08490</i> and <i>PA14_08500</i> .                                                                                               |
| <i>argG</i>                                                       | smooth                                  | 18740            | 1                     |                                                                                                                                                                          |
| <i>clpS</i>                                                       | reduced                                 | 30210            | 1                     | First gene in 2-gene operon with <i>PA14_30230</i> .                                                                                                                     |
| <i>clpX</i>                                                       | flatter/shiny                           | 41230            | 2                     |                                                                                                                                                                          |
| <i>cupA1</i>                                                      | smooth                                  | 37060            | 1                     | First gene in 6-gene <i>cupA</i> operon; last gene, <i>PA14_36990</i> , encodes an EAL-containing protein that degrades cyclic-di-GMP (Kulasakara <i>et al.</i> , 2006). |

|                               |                                   |       |   |                                                                                                       |
|-------------------------------|-----------------------------------|-------|---|-------------------------------------------------------------------------------------------------------|
| <i>cupA4</i>                  | smooth                            | 37010 | 4 | Fourth gene in 6-gene <i>cupA</i> operon.                                                             |
| <i>cupA5</i>                  | smooth                            | 37000 | 2 | Fifth gene in 6-gene <i>cupA</i> operon.                                                              |
| <i>cyaB</i>                   | reduced                           | 22620 | 1 |                                                                                                       |
| <i>cysD</i>                   | translucent,<br>small<br>wrinkles | 57720 | 1 | First gene in 2-gene operon with <i>PA14_57710</i> .                                                  |
| <i>cysH</i>                   | reduced                           | 41840 | 1 | First gene in 2-gene operon with <i>PA14_41860</i> .                                                  |
| <i>fadB</i>                   | reduced                           | 25080 | 1 | First gene in 2-gene operon with <i>PA14_25090</i> .                                                  |
| <i>fadD1</i>                  | smooth                            | 21370 | 1 | Hit in sense orientation at 3' end of gene; may read into <i>PA14_21380</i> .                         |
| <i>fimV</i>                   | reduced                           | 23830 | 1 |                                                                                                       |
| <i>glnE</i>                   | reduced                           | 66270 | 1 |                                                                                                       |
| <i>hisA/67900<sup>c</sup></i> | reduced                           | 67890 | 1 | Between third and fourth gene in 5-gene operon spanning from <i>PA14_67930</i> to <i>PA14_67880</i> . |
| <i>hpd</i>                    | smooth                            | 53070 | 2 |                                                                                                       |
| <i>kdpD</i>                   | reduced                           | 43350 | 1 |                                                                                                       |
| <i>lemA (gacS)</i>            | smooth                            | 52260 | 2 | First gene in 2-gene operon with <i>PA14_52270</i> .                                                  |
| <i>leuD</i>                   | reduced                           | 23760 | 1 | Second gene in 2-gene operon with <i>PA14_23750</i> .                                                 |
| <i>mocA/15000<sup>c</sup></i> | smooth                            | 14990 | 1 | Might overexpress <i>mocA</i> and/or knock out <i>PA14_15000</i> .                                    |
| <i>mtlR</i>                   | flatter/shiny                     | 34440 | 1 | First gene in 7-gene operon spanning to <i>PA14_34350</i> .                                           |
| <i>mutS</i>                   | reduced                           | 17500 | 1 |                                                                                                       |
| <i>nadB</i>                   | reduced                           | 54450 | 3 |                                                                                                       |
| <i>nuoD</i>                   | reduced                           | 29990 | 1 | Second gene in 4-gene operon between <i>PA14_30010</i> and <i>PA14_29970</i> .                        |
| <i>pelA</i>                   | smooth                            | 24480 | 5 | First gene in 7-gene <i>pel</i> operon.                                                               |
| <i>pelB</i>                   | smooth                            | 24490 | 1 | Second gene in 7-gene <i>pel</i> operon.                                                              |
| <i>pelD</i>                   | smooth                            | 24510 | 2 | Fourth gene in 7-gene <i>pel</i> operon.                                                              |
| <i>pelF</i>                   | smooth                            | 24550 | 1 | Sixth gene in 7-gene <i>pel</i>                                                                       |

|                           |                              |             |    |                                                                                               |
|---------------------------|------------------------------|-------------|----|-----------------------------------------------------------------------------------------------|
|                           |                              |             |    | operon.                                                                                       |
| <i>phhR</i>               | smooth                       | 52980       | 2  |                                                                                               |
| <i>phoQ</i>               | smooth                       | 49170       | 1  | Hit in the last gene of the 2-gene operon.                                                    |
| <i>phzA1/A2</i>           | reduced                      | 09480/39970 | 1  | Sequencing unable to discriminate between the homologous <i>phzA1</i> and <i>phzA2</i> genes. |
| <i>pilF</i>               | reduced                      | 14850       | 1  | Third gene in 8-gene operon between <i>PA14_14820</i> and <i>PA14_14910</i> .                 |
| <i>pilG/H<sup>c</sup></i> | reduced                      | 05320/05330 | 1  | Between first 2 genes in 3-gene operon with <i>PA14_05340</i> .                               |
| <i>pilI</i>               | reduced                      | 05340       | 1  | Last gene in 3-gene operon.                                                                   |
| <i>pilS</i>               | reduced                      | 60250       | 2  | Second gene in 3-gene operon between <i>PA14_60240</i> and <i>PA14_60260</i> .                |
| <i>pilW</i>               | reduced                      | 60290       | 3  | Second gene in 4-gene operon between <i>PA14_60280</i> and <i>PA14_60310</i> .                |
| <i>pilX</i>               | smooth                       | 60300       | 1  | Third gene in 4-gene operon between <i>PA14_60280</i> and <i>PA14_60310</i> .                 |
| <i>pilY1</i>              | reduced                      | 60310       | 12 | Fourth gene in 4-gene operon between <i>PA14_60280</i> and <i>PA14_60310</i> .                |
| <i>potF</i>               | smaller and tighter wrinkles | 30570       | 2  | Hit in sense orientation near 3' end of gene; may read into <i>PA14_30560</i> .               |
| <i>pqsB</i>               | reduced                      | 51420       | 1  | Second gene in 5-gene operon between <i>PA14_51430</i> and <i>PA14_51380</i> .                |
| <i>pqsL</i>               | reduced                      | 09700       | 1  |                                                                                               |
| <i>pqsR</i>               | smooth                       | 51340       | 1  |                                                                                               |
| <i>pstB</i>               | reduced /shiny               | 70810       | 1  |                                                                                               |
| <i>ptsP</i>               | reduced                      | 04410       | 2  | Second gene in 2-gene operon, after <i>PA14_04390</i>                                         |

|                                                                           |              |       |   |                                                                                                                                        |
|---------------------------------------------------------------------------|--------------|-------|---|----------------------------------------------------------------------------------------------------------------------------------------|
|                                                                           |              |       |   | ( <i>nudH</i> ).                                                                                                                       |
| <i>pvrR</i>                                                               | smooth       | 59790 | 2 | Second gene in 2-gene operon, after <i>PA14_59800</i> .                                                                                |
| <i>pvrS</i>                                                               | reduced      | 59800 | 2 | First gene in 2-gene operon, before <i>PA14_59790</i> .                                                                                |
| <i>pvdL</i>                                                               | smooth       | 33280 | 1 | Second gene in 2-gene operon, after <i>PA14_33270</i> .                                                                                |
| <i>rfaA</i>                                                               | reduced      | 68200 | 1 | First gene in 2-gene operon, before <i>PA14_68210</i> .                                                                                |
| <i>secB</i>                                                               | reduced      | 67720 | 1 |                                                                                                                                        |
| <i>serB</i>                                                               | reduced      | 65560 | 1 |                                                                                                                                        |
| <i>thrC</i>                                                               | smooth/shiny | 16090 | 1 | Second gene in 2-gene operon, after <i>PA14_16070</i> .                                                                                |
| <i>zwf</i>                                                                | reduced      | 23070 | 1 | First gene in 3-gene operon extending to <i>PA14_23090</i> .                                                                           |
| <b><i>Mutants with enhanced colony wrinkling compared to parental</i></b> |              |       |   |                                                                                                                                        |
| <i>bifA</i>                                                               | hyper        | 56790 | 1 |                                                                                                                                        |
| <i>bswR</i>                                                               | hyper        | 28130 | 1 | First gene in 2-gene operon, before <i>PA14_28120</i> .                                                                                |
| <i>cbrA</i>                                                               | hyper        | 62530 | 1 | Second gene in 2-gene operon, after <i>PA14_62520</i> .                                                                                |
| <i>cbrB</i>                                                               | hyper/shiny  | 62540 | 1 |                                                                                                                                        |
| <i>hslV</i>                                                               | hyper        | 66770 | 1 |                                                                                                                                        |
| <i>orfH</i>                                                               | hyper        | 23380 | 1 |                                                                                                                                        |
| <i>PA14_21290</i>                                                         | slight hyper | 21290 | 1 |                                                                                                                                        |
| <i>PA14_28430</i>                                                         | hyper        | 28430 | 1 | Hit in sense orientation near 3' end of gene; may read into <i>PA14_28420</i> , which encodes a LysR-family transcriptional regulator. |
| <i>PA14_28810</i>                                                         | hyper        | 28810 | 2 | Both hits in sense orientation near 3' end of gene; may read into <i>PA14_28820</i> .                                                  |
| <i>PA14_41450</i>                                                         | hyper        | 41450 | 1 | May interrupt promoter of operon; <i>acnB</i> is downstream gene.                                                                      |
| <i>PA14_64320</i>                                                         | hyper        | 64320 | 1 | First gene in 2-gene operon, before <i>PA14_64335</i> .                                                                                |
| <i>PA14_66100</i>                                                         | hyper        | 66100 | 1 | Second gene in 2-gene operon, after <i>PA14_66090</i> .                                                                                |

|                               |                                |             |   |                                                                                                                                                                                                                                                 |
|-------------------------------|--------------------------------|-------------|---|-------------------------------------------------------------------------------------------------------------------------------------------------------------------------------------------------------------------------------------------------|
| <i>PA14_69700</i>             | hyper                          | 69700       | 2 | Fourth gene in a 6-gene operon between <i>PA14_69660</i> and <i>PA14_69720</i> .                                                                                                                                                                |
| <i>pcm</i>                    | hyper                          | 17460       | 1 | Second gene in 2-gene operon, after <i>PA14_17450</i> .                                                                                                                                                                                         |
| <i>pilK/chpA</i> <sup>c</sup> | hyper-wrinkled, hyper-spreader | 05380/05390 | 1 | Between second and third genes of a 7-gene operon between <i>PA14_05360</i> and <i>PA14_05430</i> .                                                                                                                                             |
| <i>pilR</i>                   | hyper                          | 60260       | 1 | Last gene in 3-gene operon beginning with <i>PA14_60240</i> .                                                                                                                                                                                   |
| <i>recG</i>                   | hyper                          | 70570       | 1 | Second gene in 2-gene operon, after <i>PA14_70560</i> . Hit in sense orientation near 3' end of gene; may read into <i>PA14_70580</i> , which is also known as <i>sadB</i> and has a known role in biofilm formation (Caiazza & O'Toole, 2004). |

Notes:

<sup>a</sup>Colony morphology phenotypes are not discrete but rather form a continuum from perfectly smooth and flat to highly wrinkled, while occasionally displaying other morphological features. Here, we use "smooth" to designate a morphology with no distinguishable wrinkles, "reduced" to designate a morphology with distinguishable wrinkles but with noticeably less wrinkling than the parental strain, and "hyper" to designate a morphology with noticeably more wrinkling than the parental strain. We use other descriptors (e.g., "shiny" and "translucent") to denote additional prominent morphological features.

<sup>b</sup>Transcriptional unit data was taken from (Wurtzel *et al.*, 2012). Genes with no comments are transcribed singly.

<sup>c</sup>The transposon inserted in the intergenic region between the 2 listed genes.

**Table S2. *Escherichia coli* strains used in this study.**

| Strain  | Relevant genotype or description                                                                                                          | Source or reference               |
|---------|-------------------------------------------------------------------------------------------------------------------------------------------|-----------------------------------|
| MTC27   | SM10 (F- <i>endA1 hsdR17 supE44 thi-1 λ- recA1 gyrA96 relA1</i> ); <i>E. coli</i> mating strain for conjugation with <i>P. aeruginosa</i> | (Simon, 1983)                     |
| MTC33   | SM10 pBT24 (mating strain for Tn mutagenesis), Gent <sup>R</sup>                                                                          | (Kulasekara <i>et al.</i> , 2005) |
| MTC570  | SM10 pEXG2- $\Delta$ <i>amrZ</i> , Gent <sup>R</sup>                                                                                      | This study                        |
| MTC1315 | SM10 pEXG2- $\Delta$ <i>bifA</i> , Gent <sup>R</sup>                                                                                      | This study                        |
| MTC1336 | SM10 pEXG2- $\Delta$ <i>16550</i> , Gent <sup>R</sup>                                                                                     | This study                        |
| MTC1346 | SM10 pEXG2- $\Delta$ <i>69700</i> , Gent <sup>R</sup>                                                                                     | This study                        |
| MTC1348 | SM10 pEXG2- $\Delta$ <i>ptsP</i> , Gent <sup>R</sup>                                                                                      | This study                        |
| MTC1408 | SM10 CTX-1- <i>16550</i> , Tet <sup>R</sup>                                                                                               | This study                        |
| MTC1529 | SM10 CTX-1- <i>P<sub>adcA</sub>-lux</i> , Tet <sup>R</sup>                                                                                | This study                        |
| MTC1551 | SM10 CTX-1- <i>ptsP</i> , Tet <sup>R</sup>                                                                                                | This study                        |
| MTC1552 | SM10 pEXG2- $\Delta$ <i>adcA</i> , Gent <sup>R</sup>                                                                                      | This study                        |
| MTC1595 | SM10 pEXG2- <i>ptsP</i> <sub><math>\Delta</math>GAF</sub> , Gent <sup>R</sup>                                                             | This study                        |
| MTC1597 | SM10 pEXG2- $\Delta$ <i>ptsO</i> , Gent <sup>R</sup>                                                                                      | This study                        |
| MTC1632 | SM10 pEXG2- $\Delta$ <i>ptsN</i> , Gent <sup>R</sup>                                                                                      | This study                        |
| MTC1699 | SM10 pEXG2- $\Delta$ <i>wspF</i> , Gent <sup>R</sup>                                                                                      | This study                        |

**Table S3. Plasmids used in this study.**

| Plasmid              | Description                                                               | Source or reference          |
|----------------------|---------------------------------------------------------------------------|------------------------------|
| pCTX-1               | mini-CTX-1, integrative tet <sup>R</sup> plasmid for <i>P. aeruginosa</i> | (Hoang <i>et al.</i> , 2000) |
| pCTX-1-lux           | CTX-1 reporter construct containing <i>luxA-E</i>                         | (Becher & Schweizer, 2000)   |
| pCTX-1- <i>16550</i> | CTX-1 containing the <i>PA14_16550</i> gene                               | This study                   |



|                                      |                                                                                                          |                                |
|--------------------------------------|----------------------------------------------------------------------------------------------------------|--------------------------------|
| pCTX-1- <i>ptsP</i>                  | CTX-1 containing the <i>ptsP</i> gene                                                                    | This study                     |
| pCTX-1-P <sub><i>adcA</i></sub> -lux | CTX-1 lux reporter driven from <i>adcA</i> promoter                                                      | This study                     |
| pEXG2                                | Integrating suicide plasmid for <i>P. aeruginosa</i> , gent <sup>R</sup> , with sucrose counterselection | (Rietsch <i>et al.</i> , 2005) |
| pEXG2-Δ <i>amrZ</i>                  | EXG2 containing flanking sequences of <i>amrZ</i>                                                        | This study                     |
| pEXG2-Δ <i>bifA</i>                  | EXG2 containing flanking sequences of <i>bifA</i>                                                        | This study                     |
| pEXG2-Δ16550                         | EXG2 containing flanking sequences of PA14_16550                                                         | This study                     |
| pEXG2-Δ69700                         | EXG2 containing flanking sequences of PA14_69700                                                         | This study                     |
| pEXG2-Δ <i>ptsP</i>                  | EXG2 containing flanking sequences of <i>ptsP</i>                                                        | This study                     |
| pEXG2-Δ <i>adcA</i>                  | EXG2 containing flanking sequences of <i>adcA</i>                                                        | This study                     |
| pEXG2- <i>ptsP</i> <sub>ΔGAF</sub>   | EXG2 containing flanking sequences of the GAF-encoding domain of <i>ptsP</i>                             | This study                     |
| pEXG2-Δ <i>ptsO</i>                  | EXG2 containing flanking sequences of <i>ptsO</i>                                                        | This study                     |
| pEXG2-Δ <i>ptsN</i>                  | EXG2 containing flanking sequences of <i>ptsN</i>                                                        | This study                     |
| pEXG2-Δ <i>wspF</i>                  | EXG2 containing flanking sequences of <i>wspF</i>                                                        | This study                     |

**Table S4. Primers used in this study.**

| Primer Name or No. | Sequence (5'-3')                                                    |
|--------------------|---------------------------------------------------------------------|
| Rnd1-ARB1          | GGCCACGCGTCGACTAGTACNNNNNNNNNNNAGAG                                 |
| Rnd1-ARB2          | GGCCACGCGTCGACTAGTACNNNNNNNNNNNACGCC                                |
| Rnd1-ARB3          | GGCCACGCGTCGACTAGTACNNNNNNNNNNNGATAT                                |
| Rnd1-TnM20         | TATAATGTGTGGAATTGTGAGCGG                                            |
| Rnd2-ARB           | GGCCACGCGTCGACTAGTAC                                                |
| Rnd2-TnM20         | ACAGGAAACAGGACTCTAGAGG                                              |
| BT20TnMseq         | CACCCAGCTTTCTTGTACAC                                                |
| 259                | <b>GGGCTTCGGC</b> GGTGCCGAGGAAGCGTTCATTG                            |
| 260                | <b>TGCGCACCCGTGGAAATTAATTAAGGTACC GAATTC</b><br>CGCTGAGGCGGTTGACCAG |
| 261                | <b>CCTCGGCACC</b> GCCGAAGCCCACGCGTAG                                |
| 262                | <b>TTATACGAGCCGGAAGCATAAATGTAAAGC AAGCTT</b><br>GGCATCCGTGGCTCAGCG  |

|     |                                                                              |
|-----|------------------------------------------------------------------------------|
|     |                                                                              |
| 547 | <b>TGCGCACCCGTGGAAATTAATTAAGGTACCGAATTC</b><br><b>CGTGGTGAACCTGAACAACCTG</b> |
| 548 | <b>GGGGCCTTCCTTGTTTCGTC</b> GTCGCGCCTGCTTGAGG                                |
| 549 | <b>GACGAACAAGGAAGGCCCC</b> CCTCAAGCAGGCGCGAC                                 |
| 550 | <b>TTATACGAGCCGGAAGCATAAATGTAAAGCAAGCTT</b><br><b>GATGCCTGCCTGGTCGAC</b>     |
| 573 | <b>GACGCTCAGG</b> GGTGTTTCCTCCGCTCGC                                         |
| 574 | <b>TGCGCACCCGTGGAAATTAATTAAGGTACC GAATTC</b><br><b>CTGGAGCAGCCGCACTTC</b>    |
| 575 | <b>AGGAAACACC</b> CCTGAGCGTCAACCCCG                                          |
| 576 | <b>TTATACGAGCCGGAAGCATAAATGTAAAGC AAGCTT</b><br><b>GGCCTCGACGAACACGTC</b>    |
| 593 | <b>CGAGGAGAAG</b> AAGCGTCTCGGTTCTCGCG                                        |
| 594 | <b>TGCGCACCCGTGGAAATTAATTAAGGTACC GAATTC</b><br><b>CTTCGTTTCAGGACAAGCGCC</b> |
| 595 | <b>CGAGACGCTT</b> CTTCTCCTCGCCGCTGC                                          |
| 596 | <b>TTATACGAGCCGGAAGCATAAATGTAAAGC AAGCTT</b><br><b>CTTGTTGCCCTTGCCGCG</b>    |
| 597 | <b>CCGGGTTGAT</b> GCTCGGGGCCTTGCTCTCC                                        |
| 598 | <b>TGCGCACCCGTGGAAATTAATTAAGGTACC GAATTC</b><br><b>TTGCCGGCCCTGTATCCTC</b>   |
| 599 | <b>GGCCCCGAGC</b> ATCAACCCGGCGGCTACC                                         |
| 600 | <b>TTATACGAGCCGGAAGCATAAATGTAAAGC AAGCTT</b><br><b>GCGCTGCTGCAACTCCAG</b>    |
| 607 | <b>TCTAGAAGTGTGGATCCCCGGGCTGCAG GAATTC</b><br><b>CGCCGCAACAGTCCATGG</b>      |
| 608 | <b>CCCCCTCGAGGTCGACGGTATCGAT AAGCTT</b><br><b>CGGGGTTGACGCTCAGG</b>          |

|     |                                                                      |
|-----|----------------------------------------------------------------------|
|     |                                                                      |
| 609 | <b>ATGTCCCAGC GGAGACAAGGCCCCGAGC</b>                                 |
| 610 | <b>CCCCCTCGAGGTCGACGGTATCGAT AAGCTT</b><br>AAGCGCCGCACGACGAAG        |
| 611 | <b>CCTTGTCTCC GCTGGGACATCCTCGAAATCGC</b>                             |
| 612 | <b>TCTAGAACTAGTGGATCCCCGGGCTGCAG GAATTC</b><br>GGGGTGACTCCATCGGTTGG  |
| 641 | <b>GACGGTATCGATAAGCTTGATATC GAATTC</b><br>CTGGGCGTCCTGCTGCAC         |
| 642 | <b>TTACCGGCAGATTTCTAAAGAAGAATTGG GGATCC</b><br>GACGCGCTTCTTTCGTGGTC  |
| 645 | <b>CAAAGAGCCA GACGCGCTTCTTTCGTGGTC</b>                               |
| 646 | <b>TGCGCACCCGTGGAAATTAATTAAGGTACC GAATTC</b><br>CCACCGTGGTGTAGCCGG   |
| 647 | <b>GAAGCGCGTC TGGCTCTTGTGCATCACCCGG</b>                              |
| 648 | <b>TTATACGAGCCGGAAGCATAAATGTAAAGC AAGCTT</b><br>TGAGGCGGGTCAGGTGCAG  |
| 676 | <b>TGCCCAGGCC CTTGGCGGAGTTCACCTTCTG</b>                              |
| 677 | <b>CTCCGCCAAG GGCCTGGGCAAGCTCGG</b>                                  |
| 678 | <b>TTATACGAGCCGGAAGCATAAATGTAAAGC AAGCTT</b><br>ATCACCGTGGGGATGCC    |
| 679 | <b>CAGGCGCATG AGGGGAGGGGAGATCAGCGG</b>                               |
| 680 | <b>TGCGCACCCGTGGAAATTAATTAAGGTACC GAATTC</b><br>AGGCGGGGAATGCTCGTCC  |
| 681 | <b>CCCCTCCCCT CATGCGCCTGATCATCGTCAGC</b>                             |
| 682 | <b>TTATACGAGCCGGAAGCATAAATGTAAAGC AAGCTT</b><br>CCAGTAGGGGTTCGGCAGGC |
| 683 | <b>GAAACGGTTG GGGCATCTTGGGGAGTCTGTC</b>                              |

|     |                                                                      |
|-----|----------------------------------------------------------------------|
| 684 | <b>TGCGCACCCGTGGAAATTAATTAAGGTACC GAATTC</b><br>GACCACCGACACCCGTTTCG |
| 685 | <b>CAAGATGCCC CAACCGTTTCGACGAAGGCGAG</b>                             |
| 686 | <b>TTATACGAGCCGGAAGCATAAATGTAAAGC AAGCTT</b><br>GCGCATCCTGCTGTTCGTC  |
| 723 | <b>ATCGAATACC GGCATGTCATTGACGATTCCG</b>                              |
| 724 | <b>TGCGCACCCGTGGAAATTAATTAAGGTACC GAATTC</b><br>CTGGTGGTGATGCCTCTCG  |
| 725 | <b>ATGACATGCC GGTATTCGATTAGCCGGGCG</b>                               |
| 726 | <b>TTATACGAGCCGGAAGCATAAATGTAAAGC AAGCTT</b><br>GATAGGCCTCGTCGCGTTG  |

NB: The listed primer sequences may include 5' overlaps for isothermal assembly and/or stitch PCR (in boldface type). The 3' end is complementary to the target genomic sequence

## Modes of strain construction

### *P. aeruginosa* strains

#### MTC590

MTC1 was mated with MTC570: 50  $\mu$ L of an overnight LB culture of MTC570 was spot-dried on an LB plate, and 100  $\mu$ L of an overnight LB culture of MTC1 was subsequently dried on top of the first spot. The plate was incubated at 37°C overnight, and the resulting colony was scraped up with a sterile loop and resuspended in 500  $\mu$ L sterile phosphate-buffered saline (PBS). An aliquot (typically 100  $\mu$ L) of the suspension was spread on LB agar containing 75  $\mu$ g/ml gentamycin and 25  $\mu$ g/ml irgasan to select for *P. aeruginosa* transformants with integrated pEXG2- $\Delta$ amrZ plasmid. Several of the resulting colonies were then inoculated into plain LB and grown at 37°C for 4-6 hours to accumulate second crossovers. Aliquots (typically 25  $\mu$ L and 100  $\mu$ L) of the LB culture were then spread on LB plates containing 6% sucrose to select against the plasmid. A number of the sucrose-resistant colonies arising were then patched on LB and LB with 20  $\mu$ g/mL gentamycin. At least 2 sucrose-resistant, gent-sensitive clones were then streaked for single colonies, checked by PCR for presence of the desired deletion, and frozen at -80°C in 25% glycerol.

#### MTC1240, 1241, 1281, 1284

These strains were isolated from the transposon mutagenesis experiment, and the locations of the transposons were determined by sequencing out from the transposon arm, as described in the Materials and Methods.

#### **MTC1381**

Constructed like MTC590, but MTC590 was mated with MTC1336.

#### **MTC1387**

Constructed like MTC590, but MTC590 was mated with MTC1348.

#### **MTC1398**

Constructed like MTC590, but MTC590 was mated with MTC1346.

#### **MTC1448**

Constructed like MTC590, but MTC1 was mated with MTC1336.

#### **MTC1450**

Constructed like MTC590, but MTC1 was mated with MTC1348.

#### **MTC1512**

Constructed like MTC590, but MTC1 was mated with MTC1346.

#### **MTC1521**

Constructed like MTC590, but MTC1 was mated with MTC1315.

#### **MTC1522**

Constructed like MTC590, but MTC1381 was mated with MTC1315.

#### **MTC1523**

Constructed like MTC590, but MTC1512 was mated with MTC1315.

#### **MTC1525**

Constructed like MTC590, but MTC1450 was mated with MTC1315.

#### **MTC1533**

MTC1 was mated with MTC1529 as described above for MTC590, and a 10- $\mu$ L aliquot of the PBS-resuspended mating mix was spread on LB plates with 75  $\mu$ g/mL tetracycline and 25  $\mu$ g/mL irgasan to select for *P. aeruginosa* transformants. At least 2 colonies were then re-

streaked for single colonies on LB-tet (25 µg/mL), grown in LB overnight at 37°C, and stored in 25% glycerol at -80°C.

**MTC1535**

Constructed like MTC1533, but MTC590 was mated with MTC1529.

**MTC1537**

Constructed like MTC1533, but MTC1381 was mated with MTC1529.

**MTC1539**

Constructed like MTC1533, but MTC1398 was mated with MTC1529.

**MTC1541**

Constructed like MTC1533, but MTC1387 was mated with MTC1529.

**MTC1543**

Constructed like MTC1533, but MTC1387 was mated with MTC1551.

**MTC1549**

Constructed like MTC1533, but MTC1381 was mated with MTC1408.

**MTC1562**

Constructed like MTC590, but MTC590 was mated with MTC1552.

**MTC1603**

Constructed like MTC590, but MTC590 was mated with MTC1597.

**MTC1605**

Constructed like MTC590, but MTC590 was mated with MTC1595.

**MTC1649**

Constructed like MTC590, but MTC1 was mated with MTC1632.

**MTC1651**

Constructed like MTC590, but MTC590 was mated with MTC1632.

**MTC1666**

Constructed like MTC590, but MTC1651 was mated with MTC1348.

#### **MTC1709**

Constructed like MTC590, but MTC1 was mated with MTC1699.

#### **MTC1711**

Constructed like MTC590, but MTC1450 was mated with MTC1699.

#### **MTC1713**

Constructed like MTC590, but MTC1 was mated with MTC1597.

#### **MTC1714**

Constructed like MTC590, but MTC1448 was mated with MTC1699.

#### **MTC1716**

Constructed like MTC590, but MTC1512 was mated with MTC1699.

### ***E. coli* strains**

#### **MTC570, 1315, 1336, 1346, 1348, 1552, 1595, 1597, 1632, 1699**

The appropriate pEXG2-derived knockout plasmids (listed in Table S2) were electroporated into SM10 (MTC27), and transformants were selected on LB plates containing 20 µg/mL gentamycin.

#### **MTC1408, 1529, 1551**

The appropriate mini-CTX-1 or mini-CTX-1-lux derivatives were electroporated into SM10 (MTC27), and transformants were selected on LB plates containing 25 µg/mL tetracycline.

### **Modes of plasmid construction**

All plasmids constructed in this study were assembled from purified PCR products (using the primers listed in Table S3) and restriction enzyme-cleaved plasmid backbones by using isothermal assembly (Gibson *et al.*, 2009).

#### **pCTX-1-16550**

The *PA14\_16550* gene was PCR-amplified from PA14 chromosomal DNA using primers 607 and 608. The resulting fragment was assembled into EcoRI/HindIII-cleaved mini-CTX-1.

### **pCTX-1-*ptsP***

The *ptsP* gene was PCR-amplified from PA14 chromosomal DNA using primers 609 and 610, and the upstream promoter was amplified using primers 611 and 612. The promoter was PCR-stitched to the CDS using primers 610 and 612. The resulting fragment was assembled into EcoRI/HindIII-cleaved mini-CTX-1.

### **pCTX-1-P<sub>adcA</sub>-lux**

The *adcA* promoter was PCR-amplified from PA14 genomic DNA using primers 641 and 642 and assembled into EcoRI/BamHI-cleaved mini-CTX-1.

### **pEXG2-Δ*amrZ***

The upstream and downstream flanking sequences of the *amrZ* gene were amplified from PA14 chromosomal DNA using primer pairs 259/260 and 261/262, respectively. A fragment containing the *amrZ* gene deletion was generated by stitch PCR using the initial fragments as self-priming templates with primers 260 and 262. The resulting deletion fragment was assembled into EcoRI/HindIII-cleaved pEXG2.

### **pEXG2-Δ*bifA***

The upstream and downstream flanking sequences of most of the *bifA* coding sequence were amplified from PA14 chromosomal DNA using primer pairs 547/548 and 549/550, respectively. A fragment containing the *bifA* gene deletion was generated by stitch PCR using the initial fragments as self-priming templates with primers 547 and 550. The resulting deletion fragment was assembled into EcoRI/HindIII-cleaved pEXG2.

### **pEXG2-Δ*16550***

The upstream and downstream flanking sequences of the *PA14\_16550* coding sequence were amplified from PA14 chromosomal DNA using primer pairs 573/574 and 575/576, respectively. A fragment containing the *PA14\_16550* gene deletion was generated by stitch PCR using the initial fragments as self-priming templates with primers 574 and 576. The resulting deletion fragment was assembled into EcoRI/HindIII-cleaved pEXG2.

### **pEXG2-Δ*69700***

The upstream and downstream flanking sequences of the *PA14\_69700* coding sequence were amplified from PA14 chromosomal DNA using primer pairs 593/594 and 595/596, respectively. A fragment containing the *PA14\_69700* gene deletion was generated by stitch PCR using the initial fragments as self-priming templates with primers 594 and 596. The resulting deletion fragment was assembled into EcoRI/HindIII-cleaved pEXG2.

### **pEXG2-Δ*ptsP***



The upstream and downstream flanking sequences of the *ptsP* coding sequence were amplified from PA14 chromosomal DNA using primer pairs 597/598 and 599/600, respectively. A fragment containing the *ptsP* gene deletion was generated by stitch PCR using the initial fragments as self-priming templates with primers 598 and 600. The resulting deletion fragment was assembled into EcoRI/HindIII-cleaved pEXG2.

#### **pEXG2- $\Delta$ *adcA***

The upstream and downstream flanking sequences of the *adcA* coding sequence were amplified from PA14 chromosomal DNA using primer pairs 645/646 and 647/648, respectively. A fragment containing the *adcA* gene deletion was generated by stitch PCR using the initial fragments as self-priming templates with primers 646 and 648. The resulting deletion fragment was assembled into EcoRI/HindIII-cleaved pEXG2.

#### **pEXG2-*ptsP* $\Delta$ GAF**

The upstream and downstream flanking sequences of the sequence encoding the GAF domain of PtsP were amplified from PA14 chromosomal DNA using primer pairs 598/676 and 677/678, respectively. A fragment containing the GAF-domain-encoding deletion was generated by stitch PCR using the initial fragments as self-priming templates with primers 598 and 678. The resulting deletion fragment was assembled into EcoRI/HindIII-cleaved pEXG2.

#### **pEXG2- $\Delta$ *ptsO***

The upstream and downstream flanking sequences of the *ptsO* coding sequence were amplified from PA14 chromosomal DNA using primer pairs 683/684 and 685/686, respectively. A fragment containing the *ptsO* gene deletion was generated by stitch PCR using the initial fragments as self-priming templates with primers 684 and 686. The resulting deletion fragment was assembled into EcoRI/HindIII-cleaved pEXG2.

#### **pEXG2- $\Delta$ *ptsN***

The upstream and downstream flanking sequences of the *ptsN* coding sequence were amplified from PA14 chromosomal DNA using primer pairs 679/680 and 681/682, respectively. A fragment containing the *ptsN* gene deletion was generated by stitch PCR using the initial fragments as self-priming templates with primers 680 and 682. The resulting deletion fragment was assembled into EcoRI/HindIII-cleaved pEXG2.

#### **pEXG2- $\Delta$ *wspF***

The upstream and downstream flanking sequences of the *wspF* coding sequence were amplified from PA14 chromosomal DNA using primer pairs 723/724 and 725/726, respectively. A fragment containing the *ptsN* gene deletion was generated by stitch PCR using the initial

fragments as self-priming templates with primers 724 and 726. The resulting deletion fragment was assembled into EcoRI/HindIII-cleaved pEXG2.

## References

- Becher, A. & H. P. Schweizer, (2000) Integration-proficient *Pseudomonas aeruginosa* vectors for isolation of single-copy chromosomal *lacZ* and *lux* gene fusions. *Biotechniques* **29**: 948-950, 952.
- Caiazza, N. C. & G. A. O'Toole, (2004) SadB is required for the transition from reversible to irreversible attachment during biofilm formation by *Pseudomonas aeruginosa* PA14. *J Bacteriol* **186**: 4476-4485.
- Gibson, D. G., L. Young, R. Y. Chuang, J. C. Venter, C. A. Hutchison, 3rd & H. O. Smith, (2009) Enzymatic assembly of DNA molecules up to several hundred kilobases. *Nat Methods* **6**: 343-345.
- Hoang, T. T., A. J. Kutchma, A. Becher & H. P. Schweizer, (2000) Integration-proficient plasmids for *Pseudomonas aeruginosa*: site-specific integration and use for engineering of reporter and expression strains. *Plasmid* **43**: 59-72.
- Kulasakara, H., V. Lee, A. Brencic, N. Liberati, J. Urbach, S. Miyata, D. G. Lee, A. N. Neely, M. Hyodo, Y. Hayakawa, F. M. Ausubel & S. Lory, (2006) Analysis of *Pseudomonas aeruginosa* diguanylate cyclases and phosphodiesterases reveals a role for bis-(3'-5')-cyclic-GMP in virulence. *Proc Natl Acad Sci U S A* **103**: 2839-2844.
- Kulasekara, H. D., I. Ventre, B. R. Kulasekara, A. Lazdunski, A. Filloux & S. Lory, (2005) A novel two-component system controls the expression of *Pseudomonas aeruginosa* fimbrial cup genes. *Mol Microbiol* **55**: 368-380.
- Rietsch, A., I. Vallet-Gely, S. L. Dove & J. J. Mekalanos, (2005) ExsE, a secreted regulator of type III secretion genes in *Pseudomonas aeruginosa*. *Proc Natl Acad Sci U S A* **102**: 8006-8011.
- Simon, R., Prieffer, U., and Puhler, A., (1983) A broad host range mobilization system for in vivo genetic engineering: transposon mutagenesis in gram-negative bacteria. *Biotechnology (N.Y.)* **1**: 784-790.
- Wurtzel, O., D. R. Yoder-Himes, K. Han, A. A. Dandekar, S. Edelheit, E. P. Greenberg, R. Sorek & S. Lory, (2012) The single-nucleotide resolution transcriptome of *Pseudomonas aeruginosa* grown in body temperature. *PLoS Pathog* **8**: e1002945.
